# Supplementary material for: Identification of regulatory modules in genome scale transcription regulatory networks
Source: BMC Syst Biol. 2017 Dec 15;11:140. doi: 10.1186/s12918-017-0493-2 (PMC5732458; doi:10.1186/s12918-017-0493-2)
Supplement: Supplementary file 7 — Co-expression levels (PCC) for each CoReg modules. This table is ordered in the same way as the heatmap (XLSX 92 kb) [file 12918_2017_493_MOESM7_ESM.xlsx]

## Sheet: Table S4
Table S4. Co-expression levels (PCC) for each CoReg modules. This table is ordered in the same way as the heatmap.
Module ID	GSE24077	GSE31158	GSE14502	GSE5623	GSE39268	GSE5622	GSE5621	GSE5626	GSE5627	GSE5628	GSE5624	GSE5625	GSE5620	GSE35580	GSE4733	GSE28297	GSE26297	GSE27985	GSE14496	GSE12404	GSE21611	GSE7631	GSE42007	GSE34130	GSE18975	GSE21684	GSE41136	GSE17479	GSE17464	GSE6176	GSE5615	GSE5685	GSE13739	GSE5686	GSE38030	GSE19520	GSE9719	GSE35325	GSE29543	GSE5633	GSE5632	GSE15876	GSE28600	GSE19271	GSE30223	GSE14106	GSE46107	GSE24517	GSE30097
1322	0.304244	0.499091	0.378372	-0.282139	-0.0834656	-0.000175183	-0.24613	-0.250998	-0.280932	-0.0592033	-0.256528	-0.304137	-0.274147	-0.13643	-0.0284885	0.233806	0.226408	0.327662	0.439251	0.45416	0.17144	0.161737	0.106263	0.265244	-0.113831	0.248236	-0.261311	0.0944027	0.0125964	0.0361693	-0.209519	-0.0242002	-0.0279138	0.00960548	0.121198	0.429884	0.248539	0.200614	0.0425284	0.284755	0.0796983	0.428738	0.755422	0.851663	0.51765	0.420217	-0.247083	0.410879	0.204646
1353	0.0840653	0.440369	0.158747	0.646746	0.0458077	-0.0422916	-0.336123	0.0315181	-0.174794	0.0855495	-0.118508	-0.131789	-0.126993	-0.180447	0.553466	0.24899	0.751185	0.484546	0.0548887	0.298026	-0.178025	-0.143992	0.298655	0.147847	0.459856	0.243588	-0.12205	0.182641	0.337694	0.538658	-0.279081	0.145001	0.291086	0.346376	-0.133136	0.151526	0.744856	0.714831	0.291629	0.535979	0.190137	0.377331	-0.217336	0.197797	0.757987	0.603675	0.899556	0.410318	0.348938
344	0.216396	0.181217	0.379903	0.828553	0.33474	0.322106	0.28061	0.0689165	0.0959996	0.552969	0.37688	0.377615	0.399513	0.10359	0.10812	0.0568536	0.417932	0.288234	0.254643	0.130525	0.125737	0.0855359	0.104124	0.248299	0.208689	0.184119	0.770749	0.746402	0.493671	0.346607	0.357637	0.306138	0.453163	0.306637	0.177095	0.0170105	0.534363	0.194113	0.549992	0.337218	0.48544	0.679303	0.00614443	0.582375	0.367574	0.300561	0.355029	0.534574	0.283489
781	0.0527396	-0.120229	-0.111939	0.582117	0.226015	-0.0425926	0.447151	0.0590552	-0.141554	-0.00557404	-0.0739136	-0.0173128	-0.118674	0.265925	0.346045	0.0674027	0.0996173	0.0404393	0.0768172	0.000750741	0.130596	-0.00680913	-0.0944893	-0.0298554	0.148839	0.045758	0.892438	0.920574	0.626209	0.513324	0.517349	0.134742	0.400482	0.403468	-0.0991465	0.0141963	0.135175	0.153513	-0.0664007	-0.0368199	0.112742	0.153378	-0.115026	0.342542	0.106003	-0.0533022	0.27648	0.397754	0.584958
852	0.391337	-0.120801	0.0260864	0.333747	0.110006	0.2635	0.1254	0.251632	-0.0526924	0.016239	0.0765717	-0.0416976	-0.0758125	0.392371	0.23288	0.449106	-0.0804212	0.172852	-0.0555399	0.212917	-0.0114205	0.123838	0.0578582	0.199509	0.0877271	-0.0211026	0.46405	0.268692	0.299908	0.241783	0.18884	0.450211	0.377285	0.16748	0.155297	-0.164215	0.212362	0.172653	0.490814	0.917533	0.824005	0.603408	0.508821	0.666965	0.641282	0.2551	0.0747011	0.269685	0.472122
1092	0.234424	-0.114595	-0.0866897	0.194605	0.0881062	0.108855	-0.00795889	0.093444	-0.0746226	0.275564	0.0775196	0.0616027	0.0384549	0.0209103	0.274638	0.100744	0.279763	0.265421	0.0752784	0.247969	0.198081	-0.0533927	-0.0682668	0.0836435	0.212649	0.00192605	0.405454	0.0836257	0.168371	0.213938	-0.0709696	0.389814	0.250612	0.190195	-0.0486657	0.732202	0.130367	0.0471595	0.260341	0.375919	0.515724	0.593936	0.55086	0.322272	-0.122826	0.148921	0.134358	0.105194	0.347629
269	0.0548815	-0.0370954	0.0688866	0.0156354	0.037474	0.217034	0.367625	0.508551	0.514476	0.452353	0.447424	0.270918	0.494323	-0.0451932	0.160025	0.0400959	0.120331	0.154884	-0.0447328	0.0822378	-0.0466376	0.223062	0.0717078	0.409218	0.107392	0.0802916	0.0632336	0.108062	0.209719	0.0463355	0.152568	0.0938746	-0.0551166	0.217086	0.0771085	-0.0583929	0.141286	0.23169	-0.0186694	0.252198	0.138293	0.0622162	-0.010711	0.176866	0.254669	0.276363	0.11014	0.126964	0.0935413
684	0.229097	0.119582	-0.000106754	0.256428	-0.132447	0.27208	0.217101	0.5396	0.605491	0.369258	0.322428	0.265663	0.316085	0.0614038	0.370403	0.441495	0.210576	-0.101696	0.0962347	0.230223	0.0326326	0.0220877	0.097543	0.0158985	0.013894	0.216792	0.181985	0.360966	0.301893	0.0297907	0.441479	-0.0399835	0.195122	0.197977	-0.0311168	-0.0292099	-0.0532158	0.290983	-0.0578862	0.472466	0.0311963	-0.0397392	0.0575904	0.017587	-0.0186796	0.208771	0.139425	0.570912	0.358796
583	0.105303	0.0540999	-0.0671919	0.817809	0.136846	0.389643	0.69905	0.291605	0.36799	0.553774	0.425914	0.608139	0.526149	0.0621355	0.0096503	-0.0364848	-0.0554202	-0.0214519	-0.0597153	0.133502	0.0620684	0.0241118	0.0906976	-0.0223684	0.255462	0.0956871	0.471032	0.238891	0.144386	-0.0333235	0.104202	0.0905016	0.0600397	0.232483	0.00150188	0.052613	-0.0744813	-0.107445	0.2687	0.175932	0.144837	0.32873	-0.0419843	0.165983	0.152041	0.227396	0.102201	0.362221	0.179365
929	0.120741	0.124754	-0.0166733	0.643802	0.330381	0.245429	0.288824	0.445343	0.294053	0.207841	0.360056	0.653217	0.56692	0.0480092	-0.0498262	0.0688467	0.0254127	-0.0191693	0.0425326	0.265247	0.057246	-0.0399833	-0.0657695	0.0960883	0.0918365	0.0949481	-0.046826	0.209639	0.108994	0.158679	0.186113	0.175817	0.235581	0.424541	-0.0492932	0.0964898	0.0433992	-0.0527539	0.158959	0.113979	-0.0108346	0.108284	0.062099	0.11688	-0.0148704	0.335835	0.0574068	0.404443	0.137662
101	0.0634015	-0.0378139	-0.0109729	0.532018	0.136126	0.173608	0.41305	0.203674	0.333553	0.271057	0.252019	0.24944	0.386194	0.095868	0.0820688	0.322373	0.020367	0.0702638	0.0201287	0.110517	0.0550324	-0.0308166	-0.0565385	0.132367	0.161737	0.243507	0.248318	0.521097	0.545214	0.176223	0.149578	0.232596	0.331933	0.349386	-0.084721	0.0411618	-0.0515288	-0.0957025	0.160873	-0.088753	-0.0905417	-0.0647876	0.0448124	0.152471	-0.0147099	0.22253	0.498592	-0.0817237	-0.0106826
469	0.223694	0.302793	0.102222	0.357937	0.209894	0.184809	0.435414	0.201237	0.492479	0.338644	0.460516	0.406791	0.382676	-0.060864	0.0844793	-0.0790454	-0.0303536	-0.0506487	-0.0726358	-0.0278817	0.0242547	-0.0257867	0.0637155	-0.00639851	0.0891886	0.0124616	0.303683	0.168531	0.10557	0.158724	0.0212768	0.230352	0.345706	0.214227	0.0767912	-0.0574888	0.0139146	-0.00629575	0.150163	0.00480488	0.0430564	-0.0174607	0.117489	0.000137945	0.156294	-0.0434881	0.0864437	-0.0934409	0.0651864
259	0.0356405	0.0473836	0.0731931	0.537408	0.215806	0.239496	0.130892	0.118933	0.190703	0.218518	0.405951	0.416881	0.321785	-0.0146174	0.0121884	0.0117678	0.0786656	0.16868	0.00321058	0.00641741	0.0945912	0.0230179	0.216369	0.0805112	-0.00807432	0.0438116	-0.0107071	0.425695	0.188721	0.152214	0.112831	0.172766	0.397301	0.155736	-0.0411329	0.0363036	0.0558832	0.110421	0.109969	0.166863	0.0817642	0.114989	0.114215	0.0133245	0.0130909	0.149457	0.257692	0.0910837	0.0665724
332	0.249044	0.264642	0.2588	0.594945	0.27562	0.108068	0.381686	0.155931	0.301301	0.367628	0.380419	0.337378	0.357917	0.168403	0.0510407	-0.044821	-0.0493861	0.0924746	0.0437974	0.0679131	0.114396	0.164843	-0.0401929	-0.0560391	0.119677	0.0852924	0.303519	0.530321	0.215227	0.10344	0.187161	0.204335	0.193698	0.124335	0.143326	-0.113518	0.138177	0.217483	0.0849707	0.207693	0.0175455	0.261528	-0.0154201	0.0283701	0.211326	0.0953443	0.0559916	0.269801	0.0975245
559	0.0576073	-0.0457547	0.254945	0.208332	0.267459	0.433112	0.257675	0.342052	0.127828	0.137191	0.239788	0.157047	0.13723	0.216729	-0.0240654	0.0405797	0.149362	0.218195	-0.0956661	0.00767145	0.0500539	0.0083858	0.0703634	0.0620284	-0.0207334	0.0232775	0.112454	-0.031619	0.0829188	0.201903	0.0189808	-0.0042823	-0.0016848	0.190571	-0.0803512	0.00936614	0.275816	-0.0664105	-0.0507486	-0.0698225	0.517359	0.0187066	0.150941	0.385691	0.257621	0.495383	0.61173	0.319876	0.35992
433	0.495185	0.137058	0.191731	0.45888	0.205998	0.170762	0.321744	0.10545	0.457183	0.475292	0.302194	0.390213	0.489878	0.0212963	-0.0608709	-0.0129967	-0.0003262	0.233677	0.0641344	0.105318	0.0516077	0.0226469	0.0650289	-0.0980485	0.0814307	-0.0138254	0.0350598	-0.0273991	-0.0450731	-0.0868426	-0.0353582	0.0459461	0.102483	0.125144	0.00689598	0.371272	0.249979	0.534327	0.182144	-0.0267638	0.0877865	0.0515129	0.0290034	0.100914	-0.0355885	0.506584	0.154019	0.436358	0.227848
925	0.193524	0.196248	0.126354	0.296763	0.377671	0.312225	0.336697	0.329228	0.280484	0.321993	0.185055	0.3426	0.266982	0.136798	0.0247846	0.0150833	0.166888	0.387344	0.0854009	0.0731958	0.226827	-0.00231611	-0.064034	0.236016	0.041265	0.105651	-0.0413419	0.130208	0.406778	0.284059	0.0488127	0.109978	-0.0805904	-0.0366217	0.0684728	0.252609	0.0458421	0.231161	0.317636	0.113925	0.168702	0.270269	0.551942	0.370023	0.286704	0.559542	-0.0333857	0.0880859	0.343926
496	0.426192	0.480462	0.1235	0.32554	0.450318	0.334486	0.33556	0.256637	0.403188	0.510018	0.271269	0.347352	0.308765	0.169878	-0.028971	-0.0421565	0.127216	0.204807	0.033038	0.230314	0.185595	0.102025	-0.0648946	-0.0425932	0.0688044	0.286058	0.0190422	-0.0214147	-0.0547516	0.0858028	-0.054313	0.0847166	-0.0652139	0.0300547	-0.0692349	-0.0416092	-0.0394291	0.0408015	0.0880127	-0.00561744	0.125999	0.190095	0.100056	0.0489558	0.383176	0.572871	-0.101342	0.103904	0.565391
804	0.201221	0.237432	0.178814	0.157682	0.555498	0.335387	0.514011	0.542744	0.322827	0.32448	0.313667	0.390117	0.303556	0.0781196	-0.105658	-0.0894112	0.00426408	0.0830151	-0.115331	0.114034	0.15444	-0.000456519	-0.0451201	-0.0746485	0.0390145	0.06815	-0.0746275	-0.0173938	-0.0502341	0.144365	-0.038448	0.118375	-0.00572554	-0.038498	0.0271065	0.0301045	0.297312	-0.0907819	-0.00451932	0.127739	-0.0110696	0.39533	0.0277962	0.07814	0.295169	0.303396	0.252408	0.167114	0.224549
633	0.078921	0.0341459	0.298578	0.228978	0.525734	0.432963	0.318308	0.290726	0.347819	0.161705	0.252525	0.325591	0.506653	0.00934282	0.212765	0.411658	-0.102079	0.165631	0.0487568	0.0635085	0.199781	0.208908	-0.132582	0.138026	-0.113917	0.179962	0.00985309	0.00945636	-0.0952628	0.052128	-0.102132	-0.0579094	0.144957	-0.0505427	0.036914	0.0693582	0.234513	0.0159889	-0.0426363	0.388401	0.421272	0.0908185	-0.00409309	0.0114946	0.196227	-0.0245987	0.128929	0.0120588	-0.00443808
92	0.175125	0.380895	0.20161	0.209732	0.408424	0.155872	0.316375	0.227722	0.300575	0.243867	0.185543	0.362016	0.201847	-0.0113596	0.0545537	0.142174	0.035373	0.146128	-0.0109184	0.142368	0.0837767	0.0365816	0.0336262	0.00455516	0.209391	0.0688206	0.124048	0.0628728	0.25469	0.208283	0.00551416	0.0682615	0.00970721	0.0353282	-0.0453115	0.0435236	0.140212	0.322019	0.0728321	0.511214	0.386004	0.0429915	0.0266201	0.215053	0.0968209	-0.00319177	0.190323	-0.00657251	0.0227677
585	0.374283	0.337761	0.19343	0.242428	0.392546	0.405232	0.262309	0.333556	0.377055	0.169618	0.193183	0.0813242	0.208037	-0.074038	0.0238811	-0.0391198	0.109132	-0.065539	0.028741	0.0480689	0.00624657	0.0281835	-0.0343379	-0.0444861	0.0654623	0.149906	0.192794	0.144549	0.575144	0.1634	0.221436	0.248823	0.0721221	-0.0518026	-0.0579864	0.144519	0.0140917	0.144289	0.196022	0.249134	0.24921	0.0553806	0.105177	0.346931	0.275527	0.0976084	0.175096	0.0728418	0.0549393
207	0.331572	0.411043	0.226639	0.0434075	0.368407	0.242499	0.116669	0.340762	0.217316	0.272083	0.171302	0.290745	0.417403	-0.0236993	0.155274	0.0893459	-0.0401783	0.105264	0.180513	0.308532	0.0262408	0.0348214	0.0437014	-0.0424103	0.0853095	0.0794491	0.322745	0.191636	0.352582	0.049488	0.143074	-0.00648918	0.0978537	0.176485	-0.061692	0.00845195	0.349908	0.0116605	-0.0170225	0.148965	0.150884	-0.0406181	0.0329455	0.0437383	-0.0671919	0.0344569	0.0294765	-0.0606885	0.0257947
349	0.257089	0.182333	0.311566	0.228499	0.597551	0.359377	0.305064	0.340774	0.184407	0.248521	0.17356	0.303494	0.27024	0.107839	0.0049348	-0.0561074	-0.013227	0.0319648	0.0960795	0.111156	0.150638	0.0206654	0.0453256	0.052961	0.00547277	0.106083	0.0755937	0.0291488	0.046392	0.040496	-0.0198495	0.135015	0.173745	-0.0234243	0.0721828	0.0845018	0.230388	0.140638	-0.0338226	0.194351	-0.0150379	-0.010728	0.0425785	0.0676432	0.135192	0.058439	0.0651042	-0.0528262	0.0399427
82	0.237342	0.0966182	0.119223	0.226961	0.221224	0.299563	0.28287	0.31165	0.375277	0.22344	0.384616	0.289823	0.437156	0.043423	0.0843077	0.0723724	0.217683	0.184119	0.170872	0.0526225	0.0338081	0.124971	0.0127169	0.024616	0.0835018	-0.00281114	0.114127	0.188949	0.173103	0.0708529	0.112482	0.0466896	0.0145509	0.0564099	-0.00243386	0.172721	0.095405	0.0942905	0.117973	0.18325	0.149475	0.180092	0.0752347	0.000687448	0.267112	0.132955	0.0588011	0.166695	0.0224805
144	0.195009	0.262028	0.157599	0.350055	0.450219	0.375694	0.396567	0.304236	0.399171	0.314786	0.269826	0.455088	0.436402	-0.00844776	0.0862121	-0.0251812	0.183413	0.109625	0.224471	0.149728	0.201692	-0.0347348	-0.0313263	-0.0449631	0.100241	0.0878803	0.0863318	0.0962686	-0.0577166	0.0341705	0.0402523	0.0275472	-0.015294	-0.0385157	0.0633349	-0.0100003	0.106339	0.123582	0.0428162	0.446678	0.191218	0.15975	0.208003	-0.0300508	0.128537	0.360578	-0.0168252	0.0214138	0.0636103
103	0.00721798	0.0403486	0.0770543	0.43579	0.17054	0.578466	0.0557346	0.39604	0.368491	0.399466	0.346149	0.269017	0.358998	0.20326	-0.0456275	0.0466296	0.172721	0.0365739	0.0239292	0.131951	0.0219649	0.118384	0.0380229	0.00931928	-0.00335545	0.0170462	0.0707701	0.0360787	-0.00870906	0.0221885	0.0883667	0.00447789	0.0453157	0.0354889	0.0180203	0.0352892	0.261929	-0.0450741	0.135947	0.140091	0.125453	0.0204219	0.164548	0.00825075	-0.0298196	0.21413	-0.0469602	0.131129	0.155139
398	0.108319	0.0325177	0.119098	0.190338	0.585644	0.328278	0.299183	0.332109	0.267346	0.240881	0.365873	0.29365	0.240087	0.0094131	0.109112	-0.108153	-0.0824778	-0.042402	0.0153068	0.103748	0.111931	0.0296839	-0.097792	-0.0456848	0.0643338	-0.0466411	-0.087975	0.0254004	0.0496089	-0.0441586	-0.0397769	0.00717966	0.0549275	0.0730437	-0.0900814	-0.0171535	0.326433	-0.0854745	0.333645	0.0366432	0.0502784	-0.0933967	0.0486628	-0.0778392	-0.0383653	0.236086	0.100095	0.166691	0.0658336
168	0.13314	0.27792	0.221618	0.113922	0.248148	0.257963	0.2002	0.23095	0.11409	0.246274	0.105591	0.168752	0.146576	0.205293	0.127602	0.0915227	0.00725681	0.0285385	-0.00592897	0.0438111	0.00336536	0.0465353	0.060748	0.0862597	0.0880938	-0.00593244	0.202914	0.0601481	0.0911002	0.0909221	0.016991	0.0476783	0.0099236	0.0125154	0.0226156	-0.0175037	0.313141	0.0547957	0.175909	0.0649857	0.2753	0.115279	0.197374	0.126913	-0.0364982	0.240255	0.277055	0.0613769	0.0097066
511	0.293311	0.466796	0.230824	0.207618	0.301092	0.269824	0.203303	0.0474004	0.034549	0.213469	0.190352	0.124672	0.111951	-0.0468243	-0.0331969	0.0472189	0.0679832	0.0234511	0.0633042	0.000945263	0.0239398	-0.0123133	0.158592	0.0515721	0.126551	0.0665832	0.246563	0.0801018	0.0559852	0.0797346	-0.0998426	-0.0308387	0.0216846	0.0373655	0.200298	0.0418516	0.372303	-0.00563273	0.171638	0.047273	0.152013	0.09731	-0.014799	0.0350828	0.279355	0.130533	0.206413	0.119312	0.139491
96	0.184047	0.392737	0.0959222	0.253679	0.271574	0.0718401	0.147024	0.145902	0.245234	0.321865	0.281984	0.211605	0.337484	-0.00974414	0.0354953	-0.0618155	-0.0232196	0.00659908	-0.0162245	0.0731069	-0.00685593	0.00680596	-0.0157946	0.135815	0.0384978	0.110743	0.0631782	0.345471	0.262484	-0.000822544	0.078035	-0.00371083	-0.0429912	-0.0426812	-0.0637215	0.157633	0.204215	-0.0392368	0.429429	-0.0641673	-0.0536799	-0.0128208	0.128335	0.0157061	0.16368	0.0945937	0.00643787	0.017266	-0.0125861
115	0.409344	0.425894	0.138236	0.0453798	0.214993	0.235516	0.20465	0.236395	0.250571	0.12821	0.107993	0.24597	0.251816	-0.0334597	0.116889	-0.0588902	-0.0655622	0.0168226	-0.0411421	0.012231	-0.0350661	-0.00214873	0.074356	0.0466125	0.0395553	0.0985136	0.0636882	0.0301804	0.0348783	0.0341835	0.373095	0.0449639	-0.00769847	-0.047223	0.187403	0.0536007	0.245955	0.0221688	0.50227	0.038629	0.101813	-0.041239	0.0455101	0.0991014	0.240372	0.0727546	0.0929257	0.011049	-0.0563813
7	0.0779605	0.175062	0.07814	0.0528094	0.11457	0.15757	0.19207	0.19762	0.26673	0.201147	0.150508	0.212821	0.23772	-0.00329604	0.122225	-0.0127547	0.141332	0.0715852	0.0184059	0.0316905	0.0376563	0.0239456	0.067986	0.0207576	0.0445491	0.15361	0.00626147	0.0384786	-0.0149947	0.0118961	0.0968189	-0.0113204	0.0041655	0.0213897	0.0309999	0.0496962	0.214157	0.120002	0.29449	0.10308	0.105527	-0.0156923	0.020733	0.00104324	-0.0303649	0.0734715	0.296654	-0.00087198	0.102695
70	0.189804	0.190242	0.0552765	0.303451	0.265139	0.0262407	0.229528	0.18139	0.37478	0.242234	0.146926	0.246277	0.29298	0.0403647	-0.029922	0.00839644	0.0752712	0.0586593	0.0264774	0.0405516	0.112278	0.017875	0.0272336	0.0744404	0.106627	0.0521009	-0.0107237	-0.00895496	-0.0389102	0.00634657	0.0222718	0.0560026	-0.0344364	-0.0254903	0.0188443	0.224886	0.167007	0.0655121	0.0335187	0.0620683	-0.0216087	0.047683	-0.0265318	0.0696951	0.177062	-0.0275745	0.0809636	0.0290292	-0.0272278
140	0.0447536	0.081919	-0.0471925	0.149434	0.047822	0.0741657	0.346212	0.174379	0.275843	0.339927	0.249543	0.264574	0.366466	0.0104649	0.0227391	-0.00532073	0.165941	0.0981888	0.0816161	0.0122709	-0.00827455	-0.0321994	0.119942	-0.045294	0.0135249	0.0168718	0.0269105	-0.0515608	-0.0400355	0.0113893	-0.0175791	-0.0408105	-0.0228287	0.0145412	0.154386	0.0258597	-0.0529131	0.0305149	0.0464291	-0.00177052	-0.032357	0.0379216	-0.0349111	0.066012	-0.0149215	0.00220196	0.0716454	0.18461	-0.00773008
255	0.178786	0.00284017	0.107627	0.324924	0.0472326	0.133253	0.11971	0.081016	0.0918422	0.116233	0.12388	0.181627	0.181755	-0.0359017	-0.00883639	-0.0206891	-0.055531	0.0801186	0.134835	0.188395	0.0610687	-0.0036914	-0.0100964	0.0475166	-0.013121	0.117055	0.0542085	-0.0591846	-0.0817867	0.103492	-0.0671564	-0.0460019	0.0977296	0.0565666	0.152689	-0.0748936	0.0588988	0.237562	-0.0384435	0.0179992	-0.0759225	0.0894438	0.0624402	0.127397	0.223273	-0.0743873	-0.00360303	0.300785	-0.0341493
137	0.0322932	-9.35964e-05	0.148451	0.107038	-0.00980289	0.126577	0.0474836	0.133511	0.0898963	0.171836	0.146347	0.098132	0.18753	0.0295467	0.249618	-0.0185571	-0.0210519	-0.0358128	0.0188602	0.196388	0.0317491	0.0264384	0.114526	0.103803	0.112155	0.122204	-0.0387471	-0.00394246	-0.0170908	0.0817637	0.0258476	-0.0500952	-0.012128	-0.00260468	0.00800174	0.0151993	0.243429	0.272084	0.140852	0.000489967	0.00646857	0.158798	0.120596	0.0346227	0.00492213	-0.0298441	-0.0104935	0.232121	0.11163
67	0.121188	-0.0255098	0.0449892	0.201773	0.208829	0.360136	0.130514	0.188632	0.126717	0.181259	0.139468	0.195542	0.159655	0.0295243	0.103385	0.137366	-0.0256453	-0.0552524	0.00571246	0.102129	0.122498	0.0949101	-0.0262952	0.0299966	-0.00867396	0.0583769	-0.0444736	0.0800689	-0.0317428	0.0480457	-0.0100563	-0.0165445	-0.0301311	-0.0243203	-0.030568	-0.0572606	0.0484416	0.0350549	0.145755	0.0220037	0.0170579	0.156687	0.022385	0.006471	-0.0215699	-0.0258015	0.0197655	0.26992	-0.0429973
8	0.121652	0.163386	0.046298	0.189746	0.251563	0.0847369	0.152262	0.0653688	0.0807305	0.121541	0.120548	0.0939686	0.136462	0.0275374	0.12926	0.00776383	0.0372168	0.00624603	0.0515536	0.0161335	0.101033	0.03146	0.00608009	-0.00303949	-0.0212674	0.105183	-0.000880136	0.0303331	0.0185136	0.0107065	0.0286987	0.0511777	0.0153977	-0.0220505	0.0501962	-0.0121638	0.00112754	0.0155013	0.0828382	0.0641022	0.0479238	-0.018557	0.191121	0.000431238	0.0873895	0.0720608	0.208661	0.224043	0.107142
2	0.260678	0.126367	0.0763932	0.301647	0.32036	0.100849	0.152153	0.0809106	0.100954	0.224971	0.126959	0.241702	0.173565	0.013244	0.00936595	-0.0203567	0.0803832	0.0401548	-0.00607709	0.0819517	0.0427959	0.0619722	0.0174459	-0.0175058	0.0140547	0.109765	0.0400331	0.0352048	0.0402744	0.0198534	0.0263802	0.0344629	0.00296791	0.0824746	-0.012406	-0.00576736	0.0495372	0.0363897	0.079595	0.272148	0.106566	0.228828	0.0352265	0.00320726	0.105024	-0.00231783	-0.0239398	0.194171	0.00844184
6	0.140652	0.095709	0.137554	0.126124	0.353784	0.149059	0.19102	0.31139	0.155199	0.1229	0.149496	0.178407	0.222993	0.0388874	0.0199048	-0.00154064	0.0102367	0.0425994	0.0467053	0.083088	0.013081	0.0246215	0.0182017	0.0516059	0.0118857	0.0566594	-0.000237093	0.0694565	0.0231149	0.0182843	0.0186839	-0.00626303	0.0513126	0.0691365	0.0145878	0.00194754	0.244824	0.0705027	0.0125212	0.119806	0.0403462	0.105055	0.0641862	0.0383613	0.0460628	-0.017384	0.100063	0.18494	0.0244358
18	0.0666988	0.118857	0.104697	0.15789	0.16096	0.158421	0.137129	0.251735	0.180814	0.257044	0.127542	0.257948	0.250712	0.00601292	-0.0151417	-0.00154698	-0.00801578	0.0016831	-0.00472661	0.0328855	0.0482876	0.069075	0.0601022	-0.0243699	0.0673471	0.0639641	0.00265865	0.0357053	0.0668832	0.028592	0.027126	-0.000579031	0.0275803	0.0164763	-0.00126407	0.00584704	0.0954495	0.0794932	0.195602	0.0480284	0.112578	0.0534922	0.12167	0.0262675	0.0565631	0.0533605	-0.00762558	0.168409	0.0808185
992	0.0345358	0.00930332	-0.00149521	-0.00242792	0.00199127	-0.00266537	0.0439461	-0.0157806	-0.00380212	-0.0122863	0.00831487	-0.00379242	-0.00674268	0.0673157	-0.113358	0.191043	0.134501	0.029838	0.0186618	0.0403885	-0.125986	0.0209332	-0.0974729	0.175612	0.120072	0.0535874	0.690551	0.15992	0.364463	0.171415	0.264473	0.442892	0.351308	0.405036	-0.209641	0.384153	-0.0597273	-0.0839993	0.082915	-0.240182	-0.0462799	0.0306678	0.153925	-0.0189314	0.758576	-0.111232	-0.130345	0.282776	-0.228418
577	0.0642799	0.0740577	0.0765384	0.382486	0.200767	0.0799015	0.0948505	0.288594	0.145777	0.1434	0.29744	0.024235	0.0862753	0.166246	-0.0312082	0.0121745	-0.0315155	0.304222	0.0878253	0.0813359	0.0504726	0.0661543	0.121872	0.175458	0.235259	0.0928884	0.726309	0.169627	0.10287	0.4213	0.299275	-0.0309791	0.133463	0.423671	0.0287231	-0.00776129	0.115017	-0.0633137	0.0126555	0.161193	-0.0143983	0.191042	-0.144509	-0.0377355	0.150834	0.225754	0.0612344	0.607587	0.0126422
599	0.43277	-0.0676653	0.0423348	0.325353	0.156209	-0.0996234	0.134802	0.192008	0.132595	0.298213	0.318479	0.231843	0.209508	0.0786977	0.0458032	0.223573	0.0558234	0.128897	0.274376	0.00433294	-0.0157256	0.308257	0.048406	0.177698	0.163319	0.164706	0.565332	0.676456	0.409464	0.685775	0.277698	0.0994214	0.163416	0.107475	0.00628645	0.127774	0.0672297	0.510931	0.106568	0.244843	0.0483297	0.238559	0.00742212	0.118963	0.0394848	0.098778	0.162239	0.231123	0.0907299
448	0.0569443	-0.0494122	-0.0503689	0.039537	-0.00800015	-0.069967	-0.0322907	-0.0670478	-0.0812468	-0.0672326	-0.0616777	-0.0418581	-0.0617134	-0.0949684	-0.0260605	0.416548	-0.0692885	0.137811	0.104757	0.0333236	-0.0137455	0.0874853	0.00908417	0.28193	0.0745634	0.0376828	0.390194	0.039248	0.0509833	0.128177	-0.00852463	0.0294789	-0.0612015	0.023015	0.539241	0.392916	0.259904	0.120325	-0.00823787	0.0190091	-0.00332738	0.13338	-0.0427897	0.307303	0.233287	-0.0494466	0.0349942	-0.039631	0.186882
906	-0.019491	0.151248	0.00146628	-0.00771714	-0.0907875	0.172395	1.64699e-05	-0.0566323	-0.0524479	-0.114172	-0.0513996	-0.0851419	-0.0865981	-0.116646	0.164003	0.191568	0.109645	0.397519	0.0184507	-0.0183634	0.110528	0.0529421	0.0647714	0.0502542	0.07159	0.0372844	0.483398	0.12354	0.142134	0.126835	0.313185	-0.0511526	0.109557	0.00417306	0.206234	0.237565	0.349862	0.180232	0.0973759	0.44845	0.384377	0.572977	0.149097	0.367676	0.0131968	0.0840704	-0.1278	-0.00317862	-0.0889817
241	0.0267662	0.0828002	-0.0343458	-0.0934834	-0.0626289	0.0155033	-0.0414474	-0.0741824	-0.0667779	-0.074751	-0.0628721	-0.00974651	-0.0987347	0.14753	0.335455	0.153726	0.15415	0.128891	-0.0387227	0.179003	-0.0117703	0.0992042	0.0307477	-0.0387938	0.0342838	0.0763196	0.105523	-0.0409702	-0.0267285	0.230041	-0.00324025	0.144803	-0.0201263	0.106272	-0.0786678	0.112266	0.243536	0.05425	0.151364	0.3457	0.1434	0.251636	0.201376	-0.0627372	0.0159745	-0.0187977	0.102244	-0.0722116	0.00284546
308	0.0661497	0.0601408	-0.0114706	0.108332	-0.0401277	-0.0564131	-0.0668779	-0.0182609	-0.0435482	-0.0867969	0.126383	0.0414681	0.0115333	0.108473	0.0981251	0.318851	0.182487	0.0987162	0.156747	-0.0235389	0.0254769	0.0571691	0.0748404	-0.00430788	0.0276661	-0.0207393	0.324818	0.105831	0.259498	0.0672195	0.116684	-0.0465024	-0.0037932	0.131653	0.142252	0.239727	0.226369	0.158451	0.11405	0.0184499	0.322161	0.289939	0.157326	0.0384645	0.233081	-0.0773163	-0.0305493	0.10929	0.128429
462	0.0359811	0.002324	0.028099	0.107967	-0.0434777	0.0388257	-0.0485431	-0.0105345	0.0121229	-0.067195	0.00420463	0.0246077	0.0586164	0.0663325	0.424457	0.246677	-0.0886708	0.225184	0.0607775	-0.0603782	-0.0510586	-0.065541	0.040818	0.22288	0.18207	-0.0443587	0.103087	0.528812	0.419223	0.354001	0.253451	0.391251	0.261789	0.250106	-0.0277992	0.224091	0.115112	-0.0527666	0.376413	0.219884	0.130741	0.0168355	0.16985	0.0976847	0.0592038	0.480538	0.393021	-0.00484179	0.0965096
795	0.222854	0.00594292	0.0836676	0.119543	-0.0552427	0.410093	0.034587	0.0049269	0.0190954	0.0193965	0.0433286	-0.0720409	-0.0986018	0.166648	0.470997	0.0548155	0.240582	0.0142428	-0.03835	0.133852	0.054819	0.143616	0.436862	0.217468	0.0921255	0.242179	0.120747	0.31405	0.34603	0.329216	0.0522293	0.283059	-0.129268	-0.0849236	0.0754105	0.405789	0.310967	0.131512	0.208957	0.229844	0.477758	0.0439626	0.363419	0.150625	-0.0599822	-0.125066	-0.0705365	0.0915147	0.065985
1367	0.0333924	-0.127987	-0.0176791	0.223692	-0.243366	0.221904	-0.196233	-0.184737	-0.16647	-0.123595	-0.182778	-0.215841	-0.188087	-0.0241192	0.413195	-0.0590737	0.0887377	0.217398	-0.140136	0.0744146	0.31457	0.226426	-0.122458	0.0244906	0.0826528	-0.0791275	-0.0468164	-0.170311	0.0615258	0.169526	0.611515	0.0376996	0.224681	-0.11082	0.660394	0.132492	-0.0111464	0.3205	-0.0204599	0.424309	-0.0480089	0.335856	0.308667	0.105061	0.212519	0.155095	0.0367113	0.030147	0.0105356
502	-0.104662	0.0059257	-0.0238915	-0.03078	-0.00193932	0.214861	-0.0491893	0.0700705	-0.0459247	0.0143283	-0.0438966	-0.0518027	-0.0587356	0.145843	0.044004	-0.0616301	0.483309	-0.0671402	-0.0344315	0.146178	0.182285	-0.028829	0.00239722	0.0718726	0.0225512	0.0370325	0.0424245	0.136704	0.0934956	0.207178	0.123033	0.326263	0.305074	0.271471	0.0734054	0.170492	0.327287	0.0959229	-0.0241116	0.0577451	0.0430124	0.127373	-0.0070936	0.0920629	0.200963	0.151191	0.417368	0.113683	0.121993
295	0.0384867	-0.0329618	-0.0105133	-0.0973576	-0.101199	-0.077196	-0.104114	-0.0898291	-0.0373908	-0.104029	-0.114373	-0.10852	-0.103399	0.0267004	0.0860822	-0.0948351	-0.0587137	-0.055829	0.076284	0.128149	-0.0238032	0.265289	0.035171	-0.0340056	0.0445647	0.00532246	-0.000445434	-0.0424069	-0.00593586	0.0556189	-0.0673401	0.0126791	0.0951092	0.0781249	0.148344	0.15781	-0.0344076	0.0642294	0.113834	0.111853	0.0513859	0.0889417	0.0709375	0.13415	0.621387	0.102365	0.362412	0.0648932	-0.000481968
500	0.101705	-0.0196949	-0.0457479	-0.0532003	-0.030731	-0.0213295	-0.0833665	0.10081	0.0357043	0.0821708	0.110535	0.0131833	0.0286651	-0.00223844	0.249153	-0.0376055	0.0164209	0.144153	0.15252	0.141773	0.28802	0.228148	0.145207	0.0320758	0.0215564	0.135444	-0.116095	0.0717234	-0.0731714	-0.0495088	0.060133	0.00068355	-0.0261291	0.127406	-0.0773025	0.20025	0.11602	0.187205	0.062601	-0.0497382	0.0465474	0.276417	0.133311	0.0711468	0.22555	-0.0749921	0.0501666	0.277241	0.0148867
50	0.198249	0.113809	0.0782133	0.0407167	0.00601365	0.0375084	0.00139325	0.0302721	0.0333353	0.0584313	-0.000692312	-0.0291704	0.0324758	-0.0164497	0.19541	-0.0298755	0.0661873	0.123852	0.0143757	0.0803681	-0.00160355	0.0983506	-0.00215363	0.208551	-0.0209791	0.167797	-0.0275672	0.00787546	-0.0339966	0.0101286	0.0148513	0.0112449	0.0222997	0.0556322	0.00415696	0.391317	0.255167	0.0238596	0.173485	0.123754	0.0633227	0.00699222	0.00242316	0.109404	0.163183	0.123364	-7.20528e-05	0.0734638	0.087629
73	0.0303489	0.0806477	0.12592	-0.0164846	0.118402	-0.00417295	0.111979	0.0781416	0.0747381	0.0878181	-0.035167	-0.00831117	0.0377241	0.0524966	-0.0171202	0.0385092	-0.0300619	0.00303841	0.0341185	0.0881269	0.0477191	0.127748	0.165541	-0.0212001	0.00706147	0.0533631	-0.0346439	0.115576	4.85102e-05	-0.0299882	0.0574128	-0.0133922	-0.0330479	-0.023846	-0.0413006	-0.000768198	0.140231	0.100776	-0.0577844	0.0826584	-0.0102183	-0.0374727	-0.0266439	0.104312	0.0848235	0.00305192	0.0953679	0.168275	0.256525
548	0.0258809	-0.0202991	-0.022372	-0.00503724	0.0707373	-0.0487697	0.0304456	-0.0383179	-0.0233483	-0.00389346	-0.0558934	-0.028686	-0.0175474	0.109233	0.120124	-0.024872	0.00262881	0.0689352	0.00327405	0.0171073	0.0103908	0.065456	-0.00996795	-0.0647627	-0.0712701	-0.0292399	0.0158548	0.0384606	0.00885437	0.0878633	0.0882862	-0.0664992	-0.0370209	-0.0734401	0.004138	0.165189	0.248788	-0.00754563	-0.0520556	0.0934861	-0.0569591	0.268827	0.0528919	-0.0481558	0.11542	0.00245706	-0.0298877	-0.00940778	0.0904285
79	0.0133357	0.121256	0.0512573	0.186066	-0.0307454	0.0277908	0.0364058	-0.0116733	0.00466724	-0.0273261	0.17672	0.003374	0.0427837	-0.0213916	0.036943	-0.00116194	0.0943762	-0.0189706	0.0248032	0.128769	0.00570777	-0.0202188	0.0857243	0.033173	0.0781487	0.165785	0.164706	0.253366	0.195415	0.048743	0.197662	0.0875128	0.30888	0.158077	-0.0290719	-0.0184514	0.0320663	0.00206818	0.188683	0.238066	0.0352593	0.0468452	0.104545	0.083298	0.125302	0.0163931	0.161852	0.181863	-0.015431
402	0.0447115	0.0307009	0.140975	0.0565508	0.0459808	-0.05004	0.00021934	0.0549185	0.0355749	-0.0585226	0.0244856	-0.0580266	-0.0268311	0.066616	-0.111425	0.0674306	0.0571719	0.0813076	0.0745086	0.0853196	-0.0374259	-0.0172845	-0.020419	-0.0654448	0.0886612	0.219447	0.0138891	0.283294	0.519742	0.023962	0.271415	0.159825	0.396955	0.128181	0.305963	-0.104302	0.20344	0.0846276	0.0479317	0.00945147	-0.0309321	-0.0301502	0.0244496	0.241844	0.0283932	0.0246222	0.123513	0.248135	-0.0126826
39	0.123876	0.0815501	0.207897	-0.0425184	-0.0234232	0.0352336	0.128936	0.129238	-0.0282322	0.0995651	0.00325513	0.0107778	-0.0251029	0.0308222	0.054054	-0.00805986	0.131228	0.0693505	0.0391367	0.0664497	0.0820876	0.0415236	0.0982403	0.0157451	-0.0294331	0.00336427	0.0283295	-0.0139352	-0.012156	-0.0132577	-0.0526313	-0.0135757	-0.0364837	-0.0261466	-0.0251002	-0.0510412	-0.0100765	0.00389127	0.0303834	0.292202	-0.0101997	0.0891092	-0.0200636	-0.00381789	0.100736	0.0754979	-0.0390178	-0.00445591	-0.00667637
206	0.0554637	0.0522423	0.067486	0.141216	0.135324	0.0300495	0.1548	0.0313109	0.0992604	0.171307	0.102781	0.143265	0.130446	0.0761621	-0.00905351	-0.00480574	0.117771	0.00540887	-0.00585467	0.0374593	0.07826	0.0358188	0.061525	0.0124779	0.0198858	0.0531783	-0.000985975	-0.0185024	0.0207447	-0.0129941	-0.0369967	0.00481278	0.0431288	0.00462672	0.00390971	-0.0400605	0.157542	0.001033	0.0927827	0.0880619	0.012504	0.0439646	-0.0347346	-0.0337749	-0.0660423	0.0518328	0.061527	-0.00894479	0.122005
10	0.154647	0.0203444	0.125169	0.044294	0.175629	0.0734122	0.200101	0.155853	0.0502746	0.130225	0.102257	0.0978861	0.0803109	0.0311153	-0.0352712	0.0182075	0.071834	0.0178043	-0.00886231	0.106482	0.0665205	-0.00102638	0.010469	0.00699727	0.0171035	0.0937957	0.17121	-0.0160645	-0.0272802	0.00317852	-0.0431611	0.0261662	0.00682962	0.0299879	0.200009	-0.0163632	0.0807928	-0.0178145	0.00234272	0.0603143	0.0681446	0.062626	-0.0100043	0.00539208	0.0807786	0.199386	0.0157992	0.0502884	-0.0355869
21	0.0744137	0.117172	0.0668188	0.150939	0.158066	0.132094	0.152053	0.141909	0.059923	0.181072	0.101251	0.22574	0.168484	0.0332597	-0.0533379	-0.0261409	0.0697285	0.0489375	-0.0176263	0.0358222	0.111654	0.0230594	-0.0160402	-0.0233842	-0.00362354	0.050295	0.15537	0.00537542	0.00138474	0.04287	0.0193708	-0.0266037	-0.027594	0.0413153	0.0672884	-0.00923202	0.0373235	0.168324	0.0324144	0.231588	0.100752	0.0533911	0.176509	0.00249375	0.069886	0.116508	0.00973356	0.0168744	0.00185055
108	0.0043546	0.00595024	0.0260388	0.0817875	0.0307445	0.189022	0.137384	0.114108	0.0241021	0.0145836	0.00121338	0.0153635	0.00655804	0.0202301	-0.000149025	0.078774	0.113598	0.121109	0.0608734	0.0395238	0.0483964	0.0518344	-0.0398615	-0.00256477	0.0374284	0.0612383	0.0255916	0.0937822	0.120219	0.0718885	0.041095	0.120461	0.159362	-0.00510708	0.0161095	-0.032397	0.391599	0.064056	-0.0231165	-0.0293431	0.153695	-0.00499303	0.00348301	0.0646197	-0.0188873	-0.0535709	0.0577934	-0.0079547	-0.0576378
85	0.155106	0.143707	0.00400009	0.136485	-0.0552886	-0.00516551	0.267767	0.116234	0.0487319	0.0387859	0.136763	0.159561	0.0625513	-0.0135232	-0.0395049	0.11596	-0.032165	0.109041	-0.0556153	0.0470998	0.0242661	0.0513141	0.0466978	0.0331456	0.0810338	0.00901538	0.0251459	0.31634	0.113629	0.0841103	0.00727836	0.093605	0.0866394	0.0106145	0.0296773	0.0935284	0.0381458	0.0525151	0.084521	-0.0235719	0.0666676	-0.0301407	0.0154123	0.121321	-0.00566986	0.00173699	0.0148397	0.0389101	-0.0406261
297	0.0533757	0.177323	0.0417845	0.0168113	-0.0755836	0.016672	0.0272355	-0.0337625	-0.0149763	0.0117056	0.0557362	0.0160117	0.00650922	0.0136806	0.134296	-0.0256896	0.202453	0.0307336	0.0151585	-0.0191556	-0.00537835	-0.00433438	0.00066424	-0.0384033	0.0203534	-0.0282995	-0.0122649	0.25129	0.2005	0.0281221	0.0773632	0.0513534	0.0777568	-0.0203654	-0.0792658	-0.0319988	-0.0344294	0.0233868	0.129101	0.0731569	-0.0336079	-0.0208324	-0.00529406	-0.0437199	-0.00428968	0.132769	-0.0350136	-0.031045	-0.049336
52	0.0626862	0.128244	-0.00177222	0.0628887	0.0730575	0.0820093	0.0271705	-0.0250169	-0.0303189	0.0822038	0.0115851	0.0666028	-0.00116237	0.0132988	0.187144	-0.0291047	0.0620354	0.0232466	-0.00671087	0.102849	0.000394135	0.0280799	-0.0149282	0.00482649	0.0302084	0.00170635	0.0694587	0.0667538	0.0691867	0.0543108	0.0108407	-0.00771247	0.0025609	0.00428312	-0.0259134	0.0784957	0.107266	-0.00530081	0.217794	-0.00300159	0.096044	0.0489952	0.0295769	0.00710477	0.0198293	0.106748	0.0591438	-0.0306871	0.0404043
1	0.00109196	0.0216335	-0.00228326	0.0050928	0.00157408	-0.0035528	-0.00732147	0.0156241	-0.0167949	0.0272489	0.0010531	-0.0160236	-0.0069741	0.0427628	0.0209407	0.00622218	0.0160481	0.0170079	0.0168592	0.10259	0.0449776	0.0694798	0.0369849	0.00653268	0.0323804	0.0324812	-0.000858442	0.0314939	0.0202251	-0.00760158	0.00893353	-0.00261018	0.0106672	-0.00531528	-0.010317	0.0201421	0.0895038	0.0104561	0.0134262	0.0653522	0.0200708	0.0796655	0.0236423	0.0191779	0.10735	0.00328231	0.0283782	0.0878712	-0.000838368
5	-0.00295348	-0.00757108	0.039154	-0.00527239	0.0223899	-0.00631642	0.0086494	0.0369662	-0.0276455	-0.00186916	-0.0218287	-0.00754946	-0.00958006	-0.000100953	0.0276129	0.0267955	0.0389446	-0.019884	0.117603	0.140161	-0.0108092	0.0278271	0.0466474	0.0377814	0.0577535	0.0925874	0.0596319	0.159679	0.0677066	0.0659401	0.029185	0.0381693	0.0328748	0.0503026	-0.000525505	0.0104563	0.104758	0.0973841	0.0571746	-0.00284317	0.115865	0.021116	0.00932374	-0.00381838	0.040837	0.00438157	0.0916293	0.169941	-0.00328532
277	0.0947574	-0.0535718	-0.0273264	-0.00663572	-0.0475562	-0.0199643	-0.0587773	-0.027335	0.0263356	-0.0325292	0.028621	0.0296561	0.0140154	0.191737	-0.00502627	-0.022592	-0.0259172	0.0708255	0.0628736	0.0283069	-0.0202671	-0.00253365	-0.0257928	0.0479756	0.10944	0.214276	0.0356065	0.200704	0.0810073	0.209573	-0.0237246	0.148966	0.146811	0.0539002	-0.086274	0.131762	0.106084	0.261196	0.0169274	0.132783	0.0756022	0.10851	0.00891133	-0.0277149	-0.0531983	0.0258585	0.342136	0.287179	0.0787848
63	0.0028342	-0.080404	-0.0371702	-0.011181	-0.0525213	-0.0471599	-0.0616706	0.0489657	-0.0541196	-0.0264333	-0.0502731	-0.0467303	-0.0402698	-0.00191519	-0.0189205	0.0685876	0.0897713	-0.0443453	0.017693	0.14865	0.0540497	0.035789	0.0628706	-0.0564788	-0.0183652	0.00616855	-0.0340158	0.388949	0.102224	-0.0207584	0.207597	-0.0226018	0.00160714	0.0196343	0.0924151	0.134447	0.047664	0.03677	-0.0265315	-0.0453363	0.025716	0.0155947	0.100589	0.192587	-0.0450235	0.0962439	0.299557	0.0792862	0.142813
203	-0.0187803	0.0579431	0.0922498	-0.00662494	-0.0112158	-0.0512124	-0.0486483	0.046579	-0.00910364	-0.0122613	-0.0632267	-0.0618289	-0.0725008	0.105536	0.0362023	0.0091368	0.058105	0.00798281	0.0192154	0.221313	-0.0108975	0.00978883	0.00800428	0.155914	-0.0128726	0.053669	0.0452244	-0.00143354	0.209151	0.0867087	0.0369924	0.126655	0.095746	0.222746	0.0454302	0.195646	0.115793	-0.0365625	0.0235197	-0.0675183	0.0584794	-0.0599138	0.00427387	0.202949	-0.0161393	0.134526	0.02089	0.127383	0.0445886
306	-0.0355851	-0.0787663	-0.0458577	-0.0360326	-0.0195476	0.0016519	-0.0372704	-0.0561261	-0.0556229	0.00787758	-0.0419088	-0.0287357	-0.0473688	0.0745717	-0.0225724	-0.0384664	-0.0286534	-0.0320635	0.03417	0.137566	0.0678774	0.101066	-0.0622015	0.0794561	0.0287781	-0.000114089	0.0910937	0.0884116	0.224286	0.02581	0.127331	0.141082	0.119642	0.0422048	0.0476735	-0.0181617	0.00377435	0.229762	-0.0306731	0.086948	0.155189	-0.0651328	-0.0276135	0.145165	-0.0513151	0.071446	0.12481	0.0020443	0.0523535
66	0.0329881	-0.00469094	0.279068	0.118383	0.464725	0.1357	0.0569048	0.191392	0.0748948	0.113296	0.0315581	0.0597782	0.0702161	0.365307	0.102008	-0.0289607	0.044346	0.0174095	0.0939307	0.127547	0.0645549	0.116773	0.114303	0.155364	0.1385	0.157738	0.00847344	0.141604	0.0797345	0.0763884	0.0610746	0.228605	0.0562498	0.0893663	0.0142731	0.0861535	0.029389	-0.00617788	0.200144	0.08222	0.163228	0.0101631	0.0374882	0.155762	-0.00285513	0.236337	0.214586	0.241047	0.194736
314	0.240639	0.0157914	0.12145	0.108758	0.22499	0.0639743	0.16885	0.256545	0.212554	0.105079	0.0642089	0.0763273	0.1108	-0.0278153	0.116735	-0.0246882	0.0253369	0.122734	0.124951	0.0229862	-0.0425427	0.111815	0.12912	-0.0372764	0.153084	0.119309	0.373824	0.140289	0.0696973	0.0344398	0.14162	0.0727619	0.0104075	0.104031	0.177655	0.369672	0.373405	0.386923	0.206757	0.135606	0.0335273	0.211034	0.0678117	0.120653	-0.048831	0.426085	0.134081	0.0198372	-0.0152341
635	0.288463	0.109025	0.109104	0.0278931	0.311078	0.00288038	-0.0281905	-0.11484	-0.023574	0.234268	0.0934651	0.125953	0.0772714	0.358737	0.462951	0.0680893	-0.137322	0.0288742	0.0109436	0.0909611	0.100424	0.0464002	0.0183425	-0.0305486	0.0979199	0.196825	-0.0395414	-0.140983	-0.0855136	-0.113995	0.214118	0.16434	0.160105	0.243351	0.215203	0.0210485	0.0934002	0.105334	0.0575412	-0.0438369	0.100539	-0.0305852	0.0677949	0.0829278	0.464914	-0.182398	0.126337	0.180791	0.523538
707	0.0670787	0.117148	0.0664502	-0.0832871	0.0113278	0.231942	-0.0308768	0.0500773	-0.0505729	0.0530716	0.00560305	0.0402573	0.000254131	0.131671	0.130378	0.279322	-0.103107	0.131486	0.430877	0.162885	0.13659	0.274794	0.0373587	0.0179819	0.175071	0.20401	-0.014865	-0.00771424	0.0827183	0.266344	0.268052	0.0813959	0.0290175	0.105325	-0.0372394	-0.0346258	0.15311	0.432861	0.336552	0.24013	0.243908	0.159499	0.0431217	0.238114	-0.0324567	0.0271384	0.625527	0.20579	0.278176
753	-0.105126	0.182692	0.0702101	0.0807387	-0.0191177	0.191872	-0.0775754	0.0517194	-0.00140433	0.0533674	0.103784	0.123374	0.0352542	0.37518	0.0396188	0.112375	-0.00811317	0.0592126	0.10556	0.211225	0.210459	0.0923692	0.234642	0.019655	0.0221425	0.34591	0.150017	0.275168	0.0817483	0.0360195	0.132211	-0.0585802	-0.052363	0.0934787	-0.0748157	0.0129363	0.0319232	0.315114	0.0164105	0.0503316	0.332515	0.170141	0.0772609	0.0440246	0.238147	0.183491	0.0779436	0.0920229	0.253148
922	0.162265	-0.047787	0.0814478	0.37934	0.0564228	0.449928	0.490534	0.2601	0.164862	0.19146	0.253108	-0.0596305	0.0308053	0.713943	0.135723	0.243152	0.311078	0.0206603	-0.0415978	0.135256	0.0236106	0.551671	0.314753	0.0277559	0.446021	0.0884197	0.152698	0.0758129	0.520622	0.358531	-0.0133877	0.260715	0.190786	0.323909	0.392796	0.395013	0.0836454	0.193995	0.260526	0.473813	0.473663	0.273677	0.170356	-0.00654337	0.378143	0.125997	-0.112936	0.244191	0.338362
566	-0.0750329	-0.0838641	0.0191211	-0.0791041	-0.107064	-0.00125572	0.00922051	0.131932	-0.0297553	0.18114	0.195232	0.228413	0.242835	0.27658	0.363888	0.313898	0.068692	0.0830277	0.219549	0.0998025	0.260868	0.146103	0.00257717	0.0118274	0.0611882	0.118964	0.296588	-0.0663206	-0.0843468	-0.0494135	0.323833	-0.117308	-0.0766085	0.0144246	-0.0491336	0.0356232	-0.122158	0.257964	0.186388	0.296798	0.202676	0.291225	0.296357	-0.00460963	0.21661	0.0662222	-0.0529639	0.12819	0.055537
528	0.0563834	-0.0167321	0.0210377	0.264249	-0.00617892	0.206866	0.231251	0.279989	0.307335	0.236975	0.32693	0.337061	0.337185	0.163497	0.104227	0.0401559	0.400031	0.187269	0.211428	0.138747	0.204261	0.12101	0.3496	0.172859	0.0260253	0.012635	0.251646	-0.0112034	0.136153	0.035579	0.230706	0.0712947	-0.0353216	-0.078341	0.307501	0.220135	0.273735	0.136704	0.575462	0.311578	0.348759	0.286381	0.272477	0.353397	0.0645347	-0.048043	-0.0610705	0.187149	0.0232552
1017	0.334848	-0.0779803	0.0468523	0.0844638	-0.100247	0.191946	0.247785	0.0106561	0.118401	0.251139	0.184422	0.211823	0.19144	0.270766	0.367921	0.375033	0.290162	0.177913	0.191299	0.184549	0.124548	0.122777	-0.0289419	-0.0445969	0.0347263	-0.124235	0.5968	0.0437907	0.099676	0.0651482	0.54874	0.00823954	-0.140662	-0.151085	0.318332	0.000885562	0.315796	0.123163	0.583111	0.471289	0.399802	0.0514309	0.532187	-0.105422	0.308228	0.199636	-0.128818	0.411465	0.0481623
686	0.00354395	-0.0432134	0.0554503	0.0183974	-0.0801154	-0.00826213	0.0509413	0.0731543	0.0574903	-0.01568	-0.0153738	-0.0168983	0.0226329	0.226833	0.430584	-0.0522669	0.400852	0.280923	0.196292	0.227544	0.122661	0.333196	0.0514423	0.216004	0.103955	-0.0325272	0.689014	0.586934	0.383043	0.149873	0.626592	0.0973144	-0.0776631	0.0199574	0.0805048	0.341003	0.14272	0.395592	0.172805	0.180075	0.699711	0.541037	0.418706	0.461947	0.189032	0.0245052	0.192328	0.063207	0.220054
456	0.00281777	-0.0290303	0.110728	0.14381	0.106658	0.163651	0.102528	0.175617	0.23685	0.0927043	0.279655	0.174285	0.300588	0.291444	0.0665211	0.00714095	0.455783	0.379117	0.154464	0.183588	0.129712	0.235543	0.101207	-0.0392739	0.0323588	0.080169	-0.0887823	0.0121202	-0.0345548	0.0261949	0.158826	0.0527795	0.282552	0.303488	0.483222	0.645692	0.0903351	0.277868	0.061314	0.202221	0.253116	0.368993	0.166361	0.260732	-0.00704971	0.290905	-0.105285	-0.101965	-0.0212266
1056	0.150495	-0.19132	-0.0495057	0.207776	0.100936	0.540808	0.300734	-0.00246774	0.0937408	0.304739	0.213833	0.434526	0.154972	0.290215	0.702103	0.0332643	0.365729	0.359464	0.132354	0.201831	0.133299	0.153191	0.123356	-0.121327	0.198844	0.118093	0.371502	0.324398	-0.0199624	0.0567346	0.441898	0.0262323	0.149004	0.42333	0.356869	-0.00616285	0.358584	0.288282	0.495083	0.577491	0.45196	0.534401	0.357348	0.341911	0.151486	0.542033	0.188236	0.0811829	0.255151
923	0.627331	0.798744	0.195649	0.422349	-0.104158	0.329154	0.439295	0.338406	0.0903459	0.536859	0.355884	0.432301	0.391844	-0.0318353	-0.157222	-0.361069	0.104403	0.678803	0.448354	0.10532	-0.0136895	0.147323	0.105041	0.321107	0.38831	0.33594	0.508768	0.36899	0.196931	0.0663096	0.0509133	0.0899101	-0.126053	-0.154838	0.963774	0.853826	0.736106	0.490133	0.51685	0.741614	-0.0333478	-0.0424022	0.555091	0.335713	0.12738	0.638591	0.125618	0.534935	0.183863
1295	0.397262	-0.231365	0.00745707	0.201494	0.127935	0.444643	0.209806	0.659083	0.463945	0.539563	0.677735	0.52863	0.608755	-0.102419	0.229167	0.456052	0.290779	0.350259	0.123892	0.147085	-0.01272	0.480691	0.411471	0.509309	0.38193	0.714165	0.604487	0.413863	0.519615	0.373793	0.227137	0.55265	0.10404	0.084784	0.116299	0.675794	0.509946	0.844689	0.246572	0.383625	0.176079	0.0246121	0.364863	0.350832	0.850042	0.79466	0.920098	0.888325	0.293843
1246	0.403063	0.7092	0.423022	0.466071	-0.101124	0.678171	0.397962	0.350155	0.343553	0.288707	0.635163	0.593314	0.654149	0.159835	0.454587	0.168841	0.343476	0.425373	0.0840582	0.108362	0.0708653	0.388527	0.0854401	-0.0642144	-0.0453322	0.0473372	0.414918	0.110939	0.0607402	0.00838202	0.411564	-0.0131307	0.0283989	0.187683	0.0461947	0.361805	0.512655	0.297248	0.22577	0.219501	0.629538	0.627739	0.411731	0.353365	-0.0721762	-0.140638	0.121501	-0.0935938	0.0624906
1297	-0.199039	0.254104	0.202834	0.759116	0.212456	0.569943	0.244338	0.612599	0.686333	0.71488	0.867164	0.900211	0.871275	-0.257779	-0.0667806	0.360219	0.367898	0.555989	0.352235	-0.0254923	-0.0296808	0.422643	0.321499	0.0382972	0.105277	0.19962	-0.0562248	0.245749	0.251887	0.111793	0.373009	0.121724	0.497619	0.329189	0.543558	0.194453	0.0621998	0.0218496	-0.0451013	0.290545	0.09172	0.256549	0.167889	0.200541	-0.119934	0.221325	0.3361	-0.270951	0.344503
839	0.36934	0.51839	-0.0763269	0.602868	0.594066	0.524168	0.693817	0.481483	0.72896	0.756691	0.630507	0.591643	0.602345	0.717847	-0.0284541	-0.0963387	0.119576	0.0636267	0.216792	0.0739177	0.140157	-0.0594567	-0.0800449	-0.163454	0.0945252	0.0513907	0.210634	0.304522	0.475343	0.160606	0.565993	0.44209	0.47577	0.319167	-0.198699	-0.2506	0.155206	-0.135243	-0.0522947	0.31617	0.214576	0.0620142	0.0316674	-0.150366	-0.0689839	0.238446	0.058464	0.430351	0.0974665
1021	0.50656	0.292111	0.441161	0.707505	0.533975	0.543835	0.597364	0.580734	0.814834	0.771484	0.736266	0.61701	0.79884	0.751886	-0.124033	-0.125011	0.178607	0.0903293	0.135	0.13967	0.24058	0.155813	-0.0822723	-0.0457296	0.323456	0.161211	-0.0376914	0.14273	0.612269	0.0299813	-0.031735	0.121213	0.212672	0.334755	0.14535	-0.0993733	-0.0360197	-0.00428057	0.634298	0.0460587	0.224118	0.178153	0.00124205	0.0588899	0.4251	0.281627	0.218161	0.262095	0.317186
1091	0.580511	0.559696	0.443577	0.756249	0.849333	0.827655	0.670533	0.7685	0.892628	0.613281	0.838341	0.790257	0.781024	0.502701	-0.10403	0.248415	0.101281	0.227552	0.0143542	0.156324	0.177571	0.0510254	-0.0968269	-0.00328641	0.17924	0.0873195	0.150068	0.157959	0.153947	-0.0123465	0.171449	0.115031	0.454301	0.48037	0.0555257	-0.064731	-0.0793621	0.192752	0.398183	0.153718	0.125141	0.0597708	-0.0284992	0.0419833	0.292917	0.874347	0.238312	0.410454	0.446545
533	0.011835	0.49815	0.0045399	0.325916	0.692964	0.67818	0.71871	0.76025	0.838103	0.356457	0.793494	0.849169	0.881184	-0.0268871	-0.12569	-0.0378274	-0.148643	-0.113763	-0.0448339	0.0931323	0.08355	-0.0155855	-0.138996	0.257038	0.0837005	0.212989	0.17057	0.215064	0.123133	0.117411	-0.0731654	0.0894568	0.54658	0.213891	0.632272	0.129727	-0.03256	0.12443	0.335204	-0.00832832	0.296611	0.0951227	0.471527	0.503451	0.0544615	0.212235	0.110432	0.367225	-0.0819561
1249	0.716992	0.631363	0.542424	0.438751	0.650828	0.380078	0.397974	0.806955	0.771021	0.804937	0.841031	0.898749	0.901186	0.212074	-0.213903	0.402469	0.305079	0.240531	-0.0796296	-0.0328042	-0.026164	0.254339	-0.0353852	0.135024	0.17634	0.186579	0.467518	0.204594	0.0891183	-0.171571	0.404333	0.071671	0.300718	0.0691006	0.157096	-0.0416435	0.639752	0.210815	0.541641	-0.0300691	0.208516	0.168591	0.12718	0.428127	0.730456	-0.0179157	-0.0475057	0.252409	0.339052
1128	0.313698	0.632198	0.589597	0.586915	0.722872	0.471812	0.712122	0.909726	0.616519	0.621263	0.637055	0.861519	0.895746	0.322133	0.622807	-0.146129	-0.102531	0.0321761	0.0883183	-0.0267386	0.303058	0.116718	0.0359834	0.245258	0.025852	0.127735	0.693838	-0.0968897	0.148117	0.10493	0.0454475	0.0133509	-0.0720394	0.178685	-0.068835	0.12236	0.408529	0.172505	0.241217	-0.13395	0.0964933	0.283738	0.136921	-0.0372224	0.243762	0.0482148	-0.0473344	0.379399	-0.0924148
759	0.312618	0.181421	0.343834	0.790089	0.637913	0.44875	0.642072	0.661412	0.665613	0.83297	0.732039	0.747532	0.794766	0.242356	-0.0394595	0.33877	0.186725	0.0767337	0.0799856	0.0769311	0.0375684	0.103916	-0.0315096	0.0733994	0.0285116	0.268304	0.353458	0.23814	0.144739	0.0787312	0.0376174	0.00303543	0.039007	0.0329047	-0.0242173	0.103122	0.133847	0.0356485	0.265991	0.0622536	0.0521943	0.0890351	0.078359	0.0060824	0.244364	0.272441	-0.0966196	0.16998	-0.0391609
414	0.0377859	0.336037	0.179912	0.713353	0.520084	0.489987	0.660601	0.498666	0.591973	0.596169	0.727761	0.748343	0.756237	-0.0572227	-0.00867724	0.0379856	0.00394372	0.156041	-3.25326e-05	0.0449316	-0.031745	0.0992962	0.0873255	-0.0354203	0.0181036	0.0896524	-0.00122007	0.271952	0.0351679	0.0929625	0.0141384	0.116953	0.257589	-0.0140518	0.249344	0.0337528	0.338069	0.206834	0.333431	0.0506473	0.0143165	-0.0783939	0.014751	0.179888	0.00777407	0.115447	-0.0315029	0.123616	-0.0485481
593	0.438007	0.103196	0.181414	0.737109	0.296563	0.688755	0.390217	0.646011	0.739708	0.680725	0.65993	0.798219	0.623667	0.0331096	0.0416989	-0.0774643	-0.0775322	-0.0699852	-0.0154311	0.0276236	-0.0533945	-0.0539177	-0.0263121	-0.0818008	0.172318	0.125015	0.110347	0.502862	0.145735	0.227083	0.0602515	0.0760336	0.0725989	-0.0523178	0.027512	-0.0140618	0.105049	-0.0258979	0.137023	-0.0539591	-0.0054859	-0.0636817	-0.0720705	-0.0163855	-0.051968	0.186326	0.298644	0.118635	-0.0926067
731	0.748818	0.575414	0.17798	0.211457	0.577951	0.406257	0.54284	0.774035	0.61552	0.475481	0.72018	0.579155	0.688062	0.0172547	0.501196	-0.0541449	0.0586415	0.114478	0.0260286	0.0213776	-0.0529725	-0.0183046	-0.0692142	0.123034	0.0121592	0.100119	0.0521294	0.496009	0.0782854	0.0312827	0.238406	0.0486417	0.299266	0.174354	0.0919719	-0.139493	0.355633	0.222386	-0.0369617	0.011523	-0.0686085	-0.0468894	-0.0529085	-0.0154599	0.106494	0.449779	0.351106	0.329229	0.110611
732	0.56191	0.598469	0.324214	0.662507	0.644694	0.436751	0.506596	0.564187	0.344254	0.649157	0.400882	0.61693	0.473525	-0.167378	0.00515745	-0.0901541	0.103821	0.0033514	0.0128914	0.174564	0.130874	0.169923	0.119906	-0.0610514	0.1421	0.252563	-0.0299303	0.184357	0.0325541	0.134007	0.190309	0.111602	0.285851	0.124407	0.0100155	0.247979	0.245422	-0.0698791	0.424634	-0.0387684	0.120261	0.173898	0.194236	-0.101858	0.306987	0.285103	-0.00914842	0.144165	-0.0573963
680	0.231421	0.357592	0.179382	0.447876	0.177936	0.412373	0.512245	0.383326	0.331184	0.394697	0.580418	0.315168	0.526644	-0.0417861	0.273759	0.237783	-0.0209464	0.15031	0.0579938	-0.0220372	0.0284761	0.0943822	0.00811434	0.0305774	0.0635744	0.0574457	0.101452	0.0556295	-0.0337996	-0.0155243	0.0824267	0.134992	0.214583	0.269718	-0.0251926	0.332622	0.324335	0.209556	0.214124	0.127017	0.058183	0.129123	0.110821	-0.0156759	-0.00490837	0.0602024	0.200461	0.303375	-0.00511083
131	0.191229	0.184688	0.195708	0.282967	0.342655	0.38779	0.394126	0.384224	0.459336	0.379614	0.421908	0.528736	0.421788	-0.019999	-0.0265404	0.11934	-0.0180275	0.0579276	-0.0185169	0.0252686	0.0195483	-0.0445967	-0.00129556	-0.0280012	0.0389007	0.0998005	0.0276902	0.0543778	0.067266	0.015899	0.152891	0.0271407	0.0449587	0.0151248	0.0904605	-0.0154705	0.170969	-0.023726	0.229705	-0.00537571	-0.0105071	-0.0531094	-0.0441789	0.0200918	0.023004	-0.024093	0.086047	0.18586	-0.0410413
670	0.197926	0.190623	0.281027	0.217753	0.346793	0.344522	0.515267	0.333731	0.484693	0.380883	0.437715	0.51474	0.644938	0.0755139	0.109954	0.0565435	0.0876239	-0.0692517	-0.0312944	0.0474839	0.0735579	0.139879	-0.0282906	0.0394754	0.0492593	0.0666862	0.0540822	0.0487461	0.0193837	-0.0106383	0.153046	0.00752346	0.209557	0.359425	-0.0481303	-0.0591262	0.179	0.0769437	0.29972	0.253727	0.134978	0.0492919	0.0200964	-0.0607065	-0.109464	0.104967	0.164138	0.112807	-0.0333221
26	0.504952	0.391591	0.299617	0.663148	0.504717	0.46759	0.517007	0.411975	0.576994	0.575142	0.637793	0.581894	0.597311	0.00705532	-0.000659242	-0.0573982	-0.00721293	-0.0481024	-0.0322988	0.0237814	0.0136266	0.028312	-0.0588553	0.0622667	-0.048479	0.120239	-0.0265205	-0.0266786	0.0340929	0.0885804	-0.0444214	0.047052	-0.00438378	0.0352551	0.0153226	-0.00981877	0.0906273	0.0129667	0.145278	-0.0174289	0.12907	-0.0523429	0.0404076	0.128279	0.0189649	0.13327	0.267537	0.0670177	-0.0740588
380	0.19479	0.236903	0.345335	0.296829	0.384857	0.479885	0.498558	0.51367	0.421483	0.469173	0.436991	0.437043	0.457417	0.129054	-0.0670554	-0.0760647	0.0756707	-0.0350344	0.0372935	0.0459367	0.0289857	0.00915726	-0.00646048	-0.0419742	-0.0180807	0.0861402	0.0107613	-0.00237057	-0.0414448	-0.0412296	0.024245	-0.0150301	0.0518814	0.0600223	0.0954866	-0.0587565	0.223913	0.116499	0.294624	-0.0165861	0.0847568	0.0759466	0.0248487	-0.0478215	-0.112964	0.377306	0.13825	-0.019037	0.0132996
1328	0.82096	0.735411	0.450209	0.937264	0.936654	0.659741	0.963652	0.940863	0.968277	0.866504	0.941342	0.926078	0.949659	-0.116564	0.343468	0.0148992	0.0480333	-0.0762232	0.149888	-0.047555	0.205508	0.295277	0.125785	0.405406	0.18419	-0.109214	-0.0967299	-0.0580661	0.59956	0.543481	-0.0993918	-0.261527	0.154429	-0.227061	0.882551	0.733616	0.396241	0.0259352	0.127361	-0.253367	0.614098	0.130724	0.318971	-0.0826802	0.72241	-0.062335	0.295605	-0.137901	0.0127807
1386	0.747469	0.726014	0.534204	0.961064	0.822336	0.566631	0.850275	0.227112	0.480228	0.843545	0.683752	0.931288	0.836862	0.00689084	-0.269229	0.214638	0.692075	0.359324	0.156797	0.0567863	0.475817	0.146268	0.259402	0.444693	0.459847	0.403299	0.671528	0.790778	0.708543	0.416555	0.647869	0.0165847	0.520995	0.212686	-0.0510349	0.420128	0.318321	-0.0476228	0.72492	0.284061	0.184318	0.439071	-0.0792847	0.0865641	0.696148	0.24209	0.178717	0.596422	0.226829
[truncated: 13 more columns]
